# Supplementary material for: A simple synthesis of surfactant-free polycrystalline CuO nanoparticles supported on carbon nanofibers for regioselective hydroboration of alkynes
Source: Royal Society of Chemistry journal article supplement (doi:10.1039/d2ra04668g), 2022-01-01
Supplement: d2ra04668g1.pdf [file d2ra04668g1.pdf]

## Supplementary Information

A Simple Synthesis of Surfactant-free Polycrystalline CuO Nanoparticles  
Supported on Carbon Nanofibers for Regioselective Hydroboration of Alkynes

### Table of Contents

|                                           |    |
|-------------------------------------------|----|
| 1. Copy of $^1\text{H}$ NMR spectra ..... | 2  |
| 2. References .....                       | 15 |

$^1\text{H}$  NMR (400 MHz, Chloroform-*d*)  $\delta$  7.50 – 7.28 (m, 6H), 6.17 (d,  $J = 18.4$  Hz, 1H), 1.32 (s, 12H)

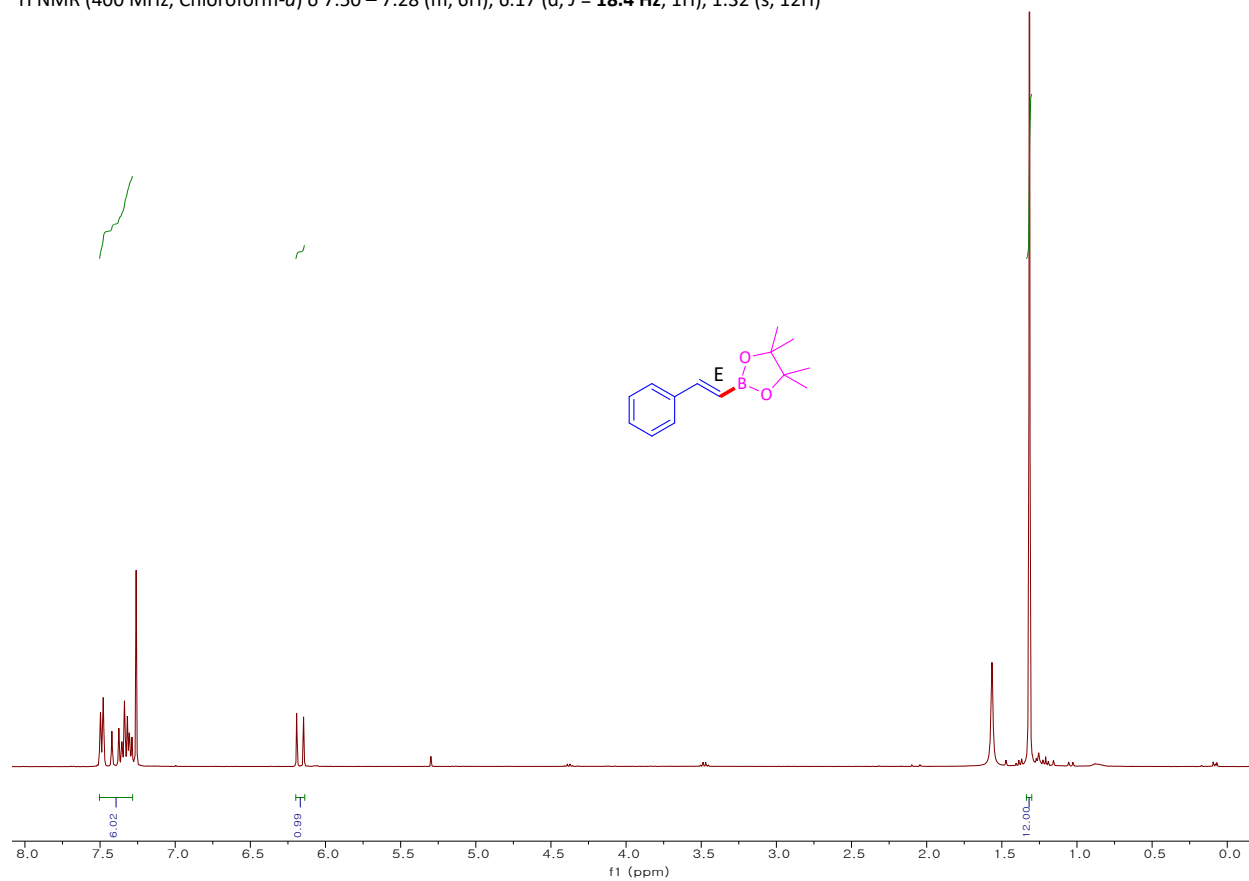

$^1\text{H}$  NMR (400 MHz, Chloroform-*d*)  $\delta$  7.41 – 7.34 (m, 3H), 7.14 (d,  $J$  = 7.8 Hz, 2H), 6.11 (d,  $J$  = 18.4 Hz, 1H), 2.34 (s, 3H), 1.31 (d,  $J$  = 1.2 Hz, 12H).

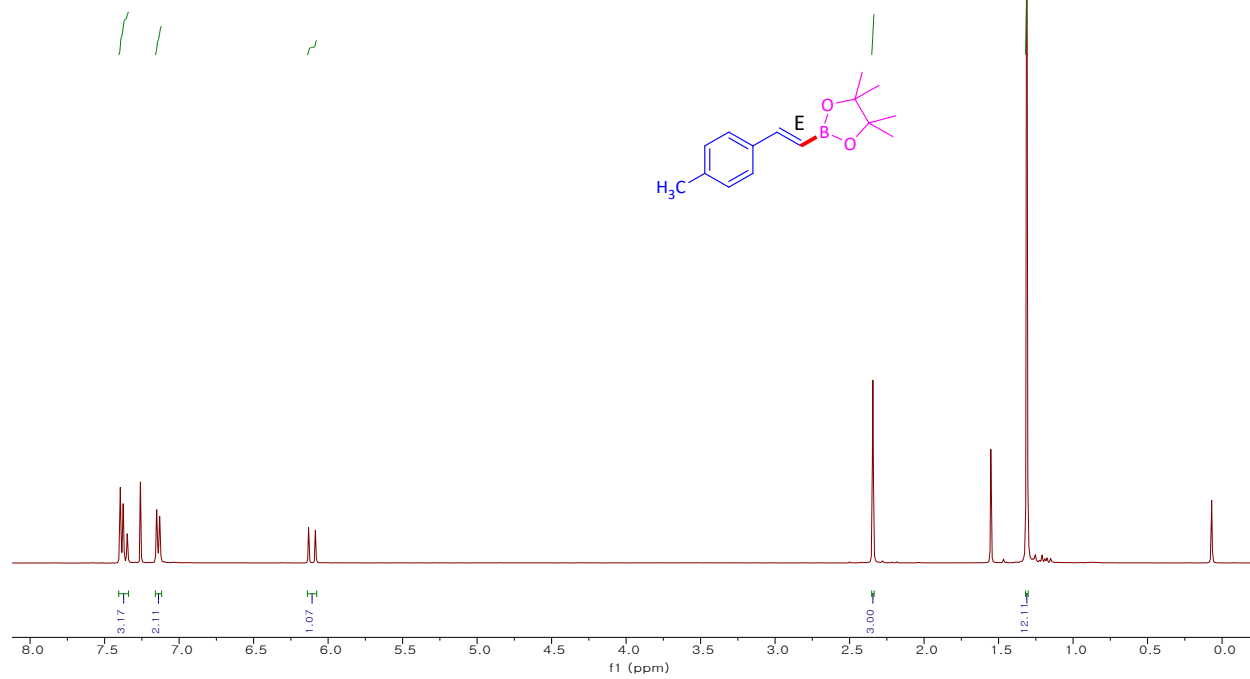

$^1\text{H}$  NMR (400 MHz, Chloroform-*d*)  $\delta$  7.43 (d,  $J = 8.5$  Hz, 2H), 7.33 (s, 1H), 6.86 (d,  $J = 8.4$  Hz, 2H), 6.01 (d,  $J = 18.4$  Hz, 1H), 3.81 (s, 3H), 1.31 (s, 12H).

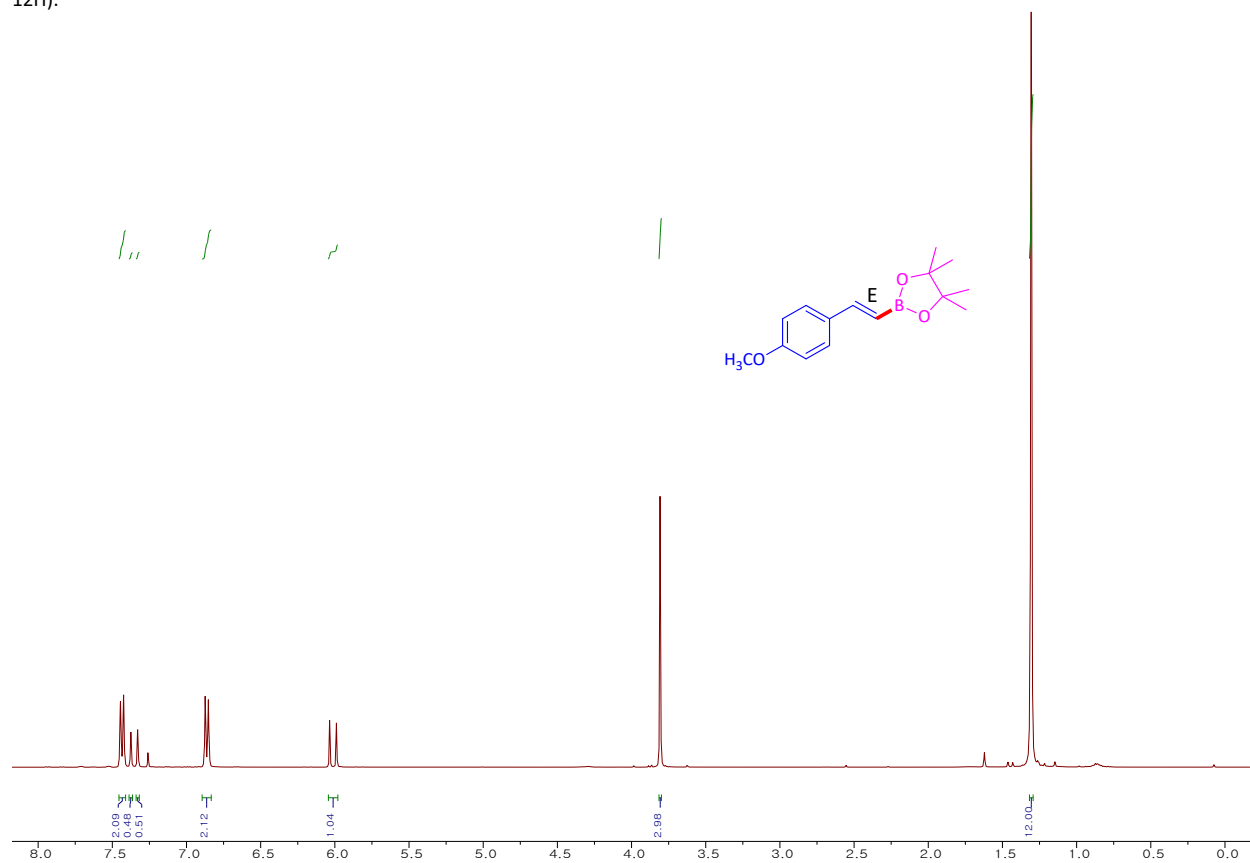

$^1\text{H}$  NMR (400 MHz, Chloroform-*d*)  $\delta$  7.42 – 7.28 (m, 5H), 6.13 (d,  $J = 18.4$  Hz, 1H), 1.31 (s, 12H).

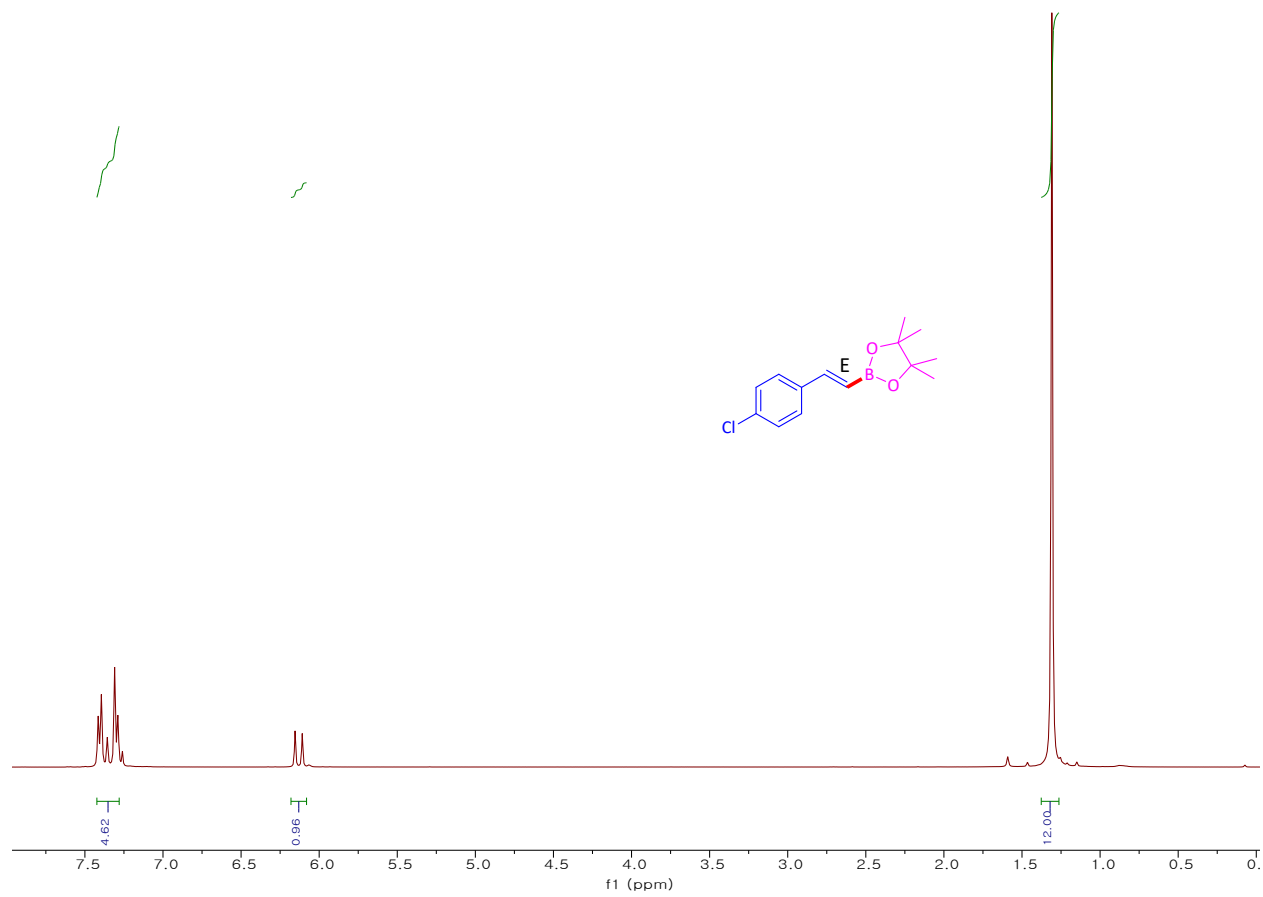

$^1\text{H}$  NMR (400 MHz, Chloroform-*d*)  $\delta$  7.42 (t,  $J = 7.3$  Hz, 2H), 7.37 – 7.34 (m, 2H), 6.12 (d,  $J = 18.4$  Hz, 1H), 1.31 (s, 21H).

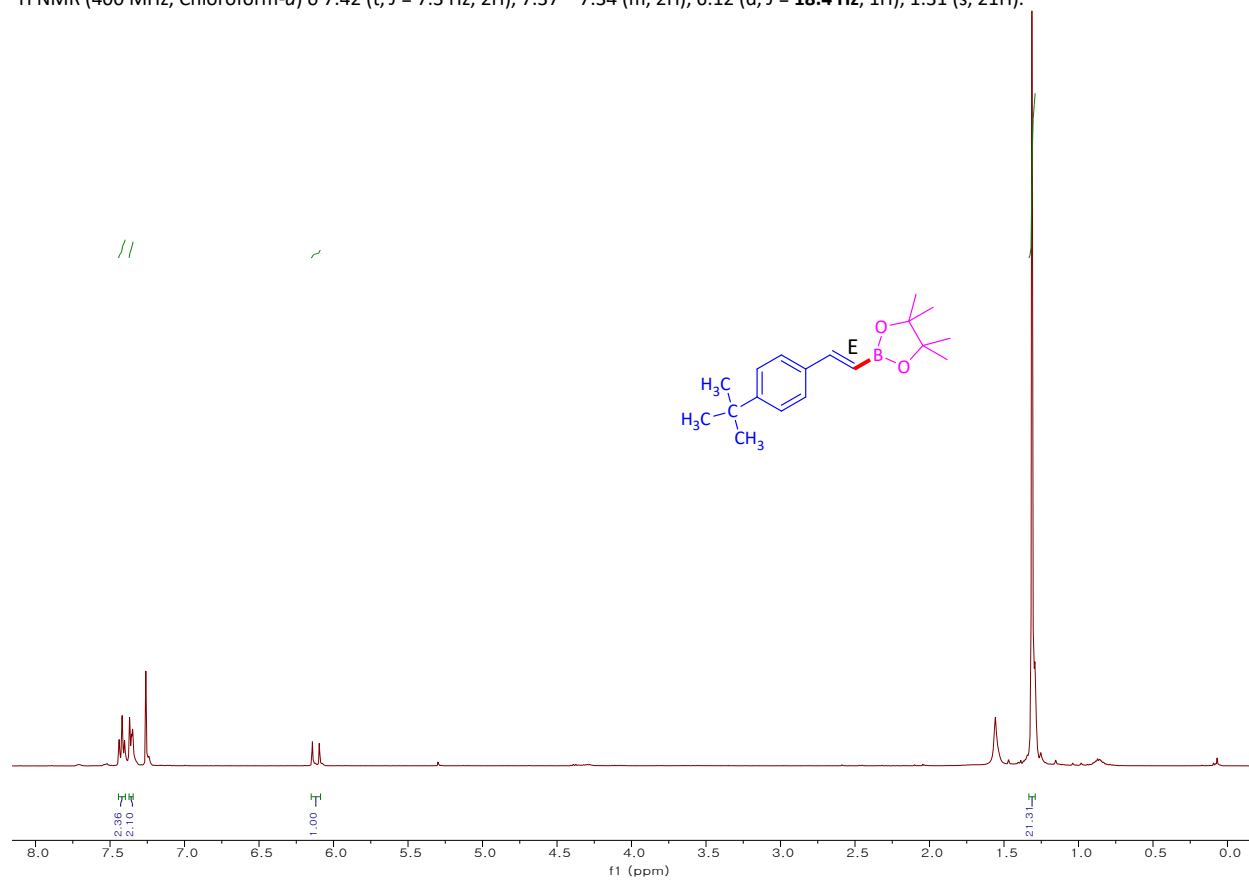

$^1\text{H}$  NMR (400 MHz, Chloroform-*d*)  $\delta$  7.62 – 7.54 (m, 4H), 7.40 (d,  $J$  = 18.4 Hz, 1H), 6.26 (d,  $J$  = 18.4 Hz, 1H), 1.32 (s, 12H).

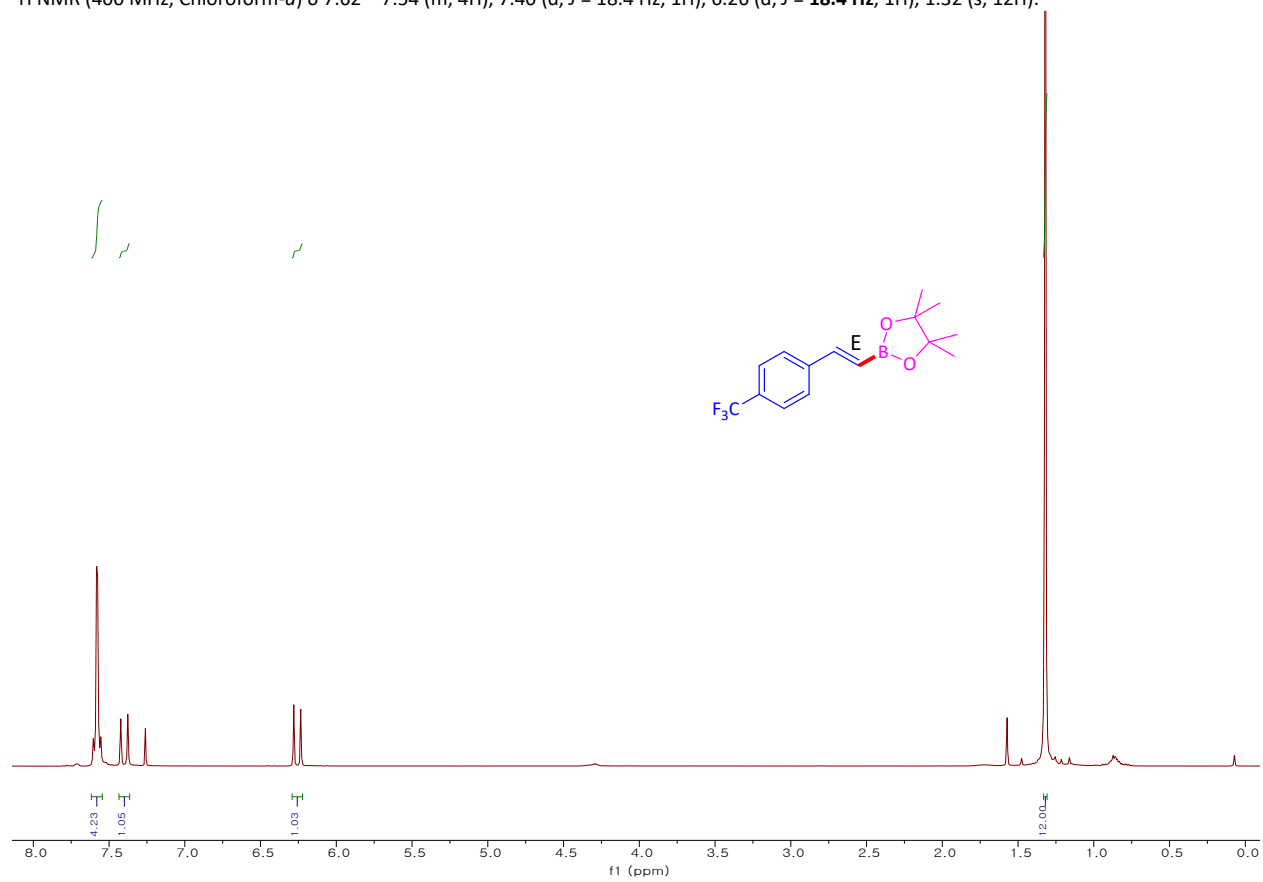

$^1\text{H}$  NMR (400 MHz, Chloroform-*d*)  $\delta$  7.64 – 7.57 (m, 6H), 7.49 – 7.42 (m, 3H), 7.35 (t,  $J = 7.3$  Hz, 1H), 6.23 (d,  $J = 18.4$  Hz, 1H), 1.34 (s, 12H).

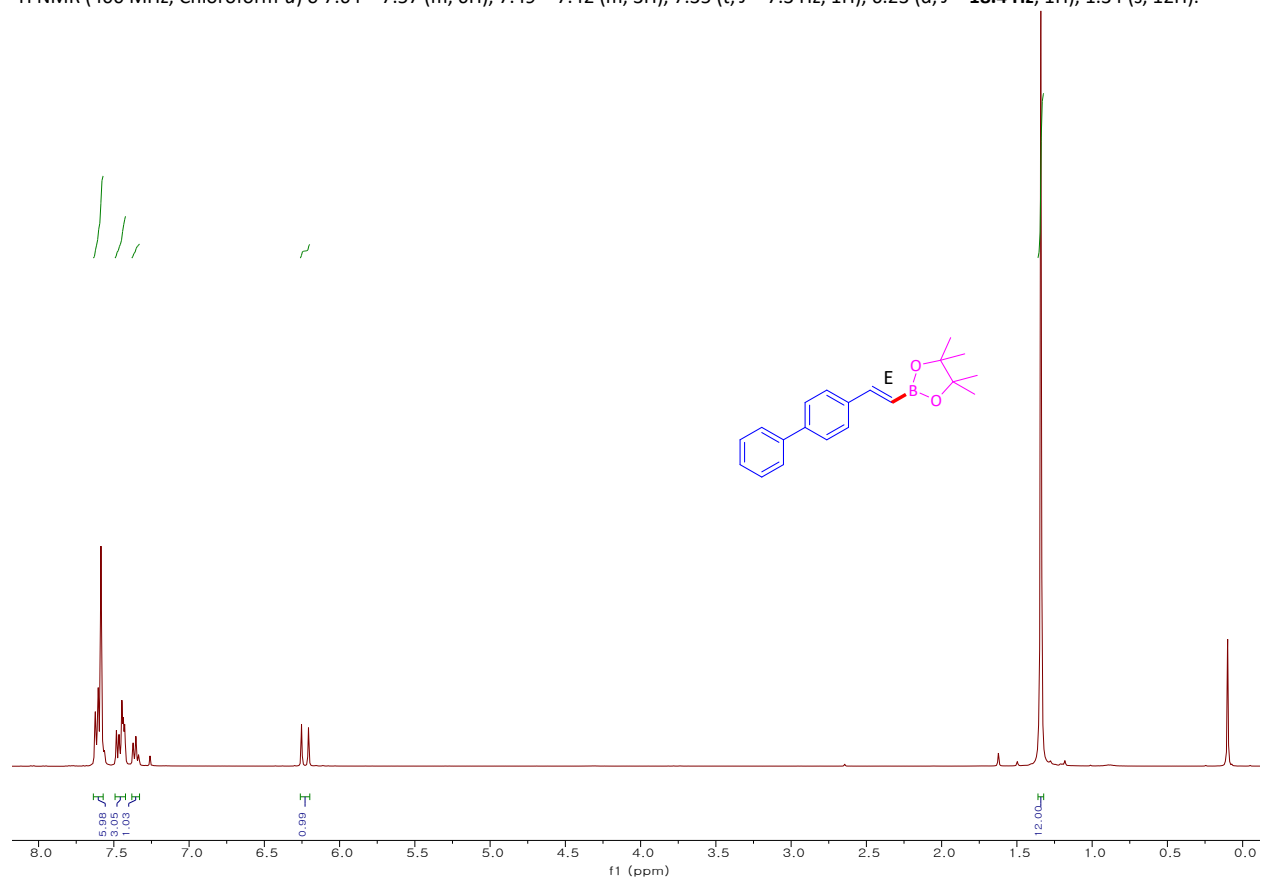



$^1\text{H}$  NMR (400 MHz, Chloroform-*d*)  $\delta$  7.60 (d,  $J = 18.3$  Hz, 1H), 7.35 (s, 1H), 6.92 (s, 1H), 6.04 (d,  $J = 18.3$  Hz, 1H), 2.36 (s, 3H), 2.22 (s, 6H), 1.32 (s, 12H).

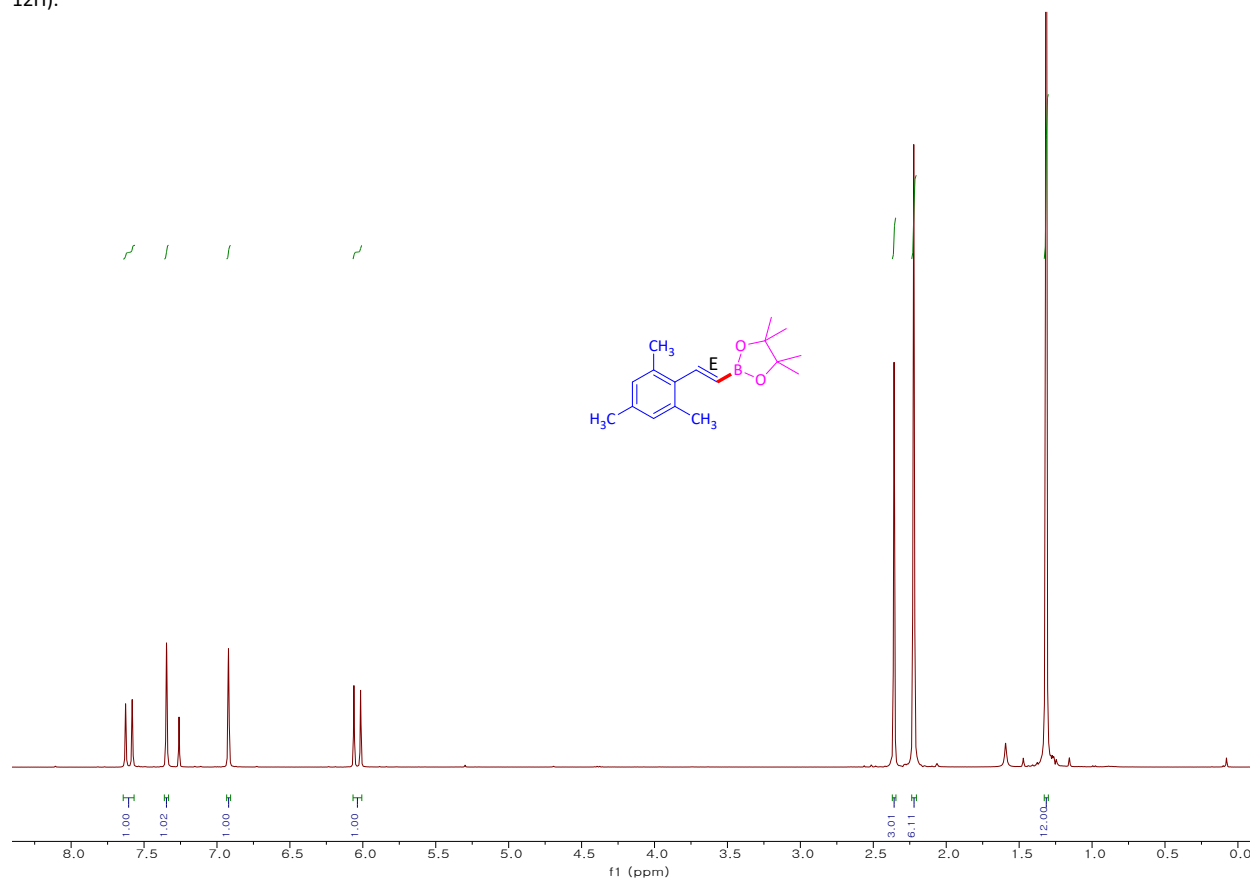

$^1\text{H}$  NMR (400 MHz, Chloroform-*d*)  $\delta$  7.49 (s, 1H), 7.27 – 7.21 (m, 1H), 7.08 (d,  $J = 3.5$  Hz, 1H), 6.98 (dd,  $J = 5.1, 3.6$  Hz, 1H), 5.91 (d,  $J = 18.1$  Hz, 1H), 1.30 (s, 12H).

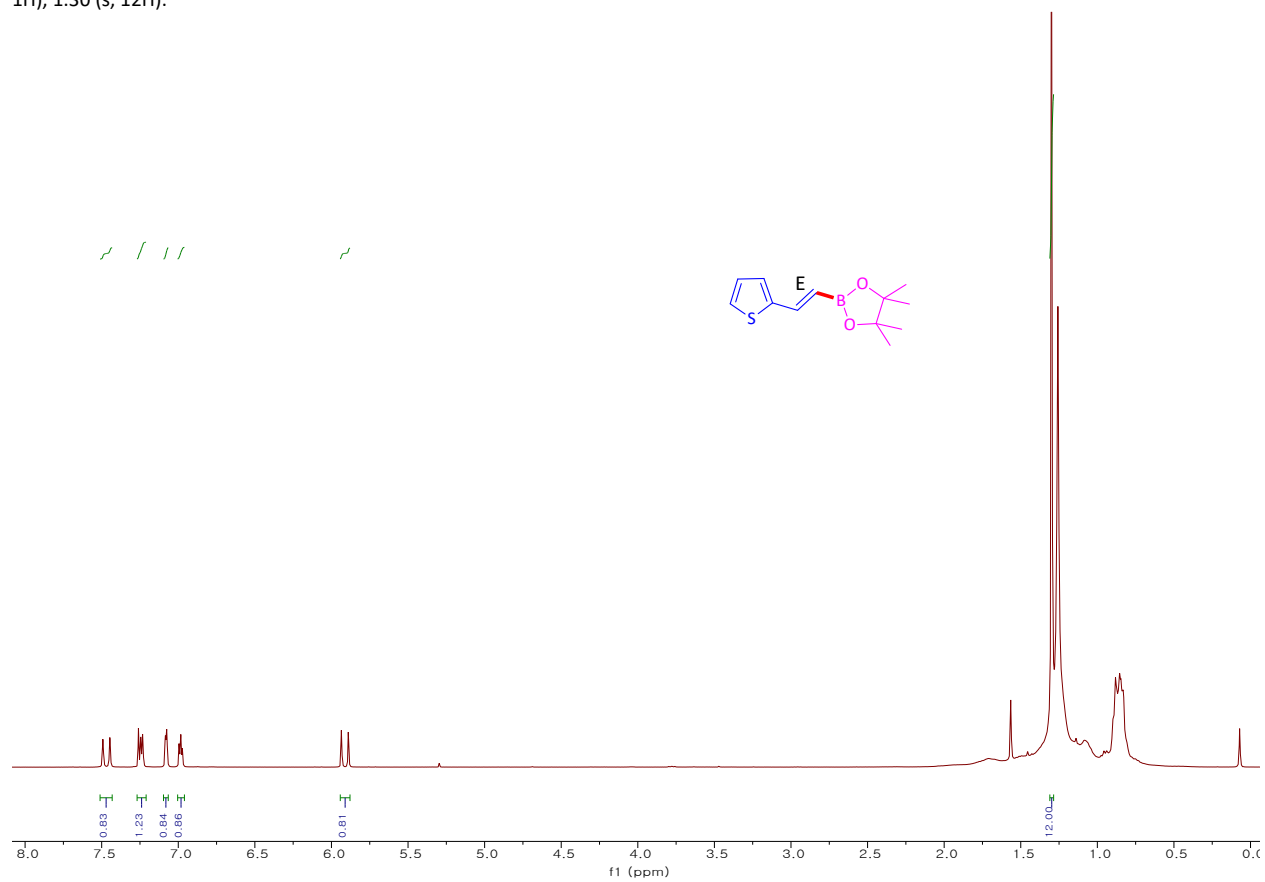

$^1\text{H}$  NMR (400 MHz, Chloroform-*d*)  $\delta$  8.60 (d,  $J = 4.8$  Hz, 1H), 7.65 (td,  $J = 7.7, 1.8$  Hz, 1H), 7.49 – 7.38 (m, 2H), 7.17 (dd,  $J = 7.5, 4.8$  Hz, 1H), 6.63 (d,  $J = 18.3$  Hz, 1H), 1.31 (s, 12H).

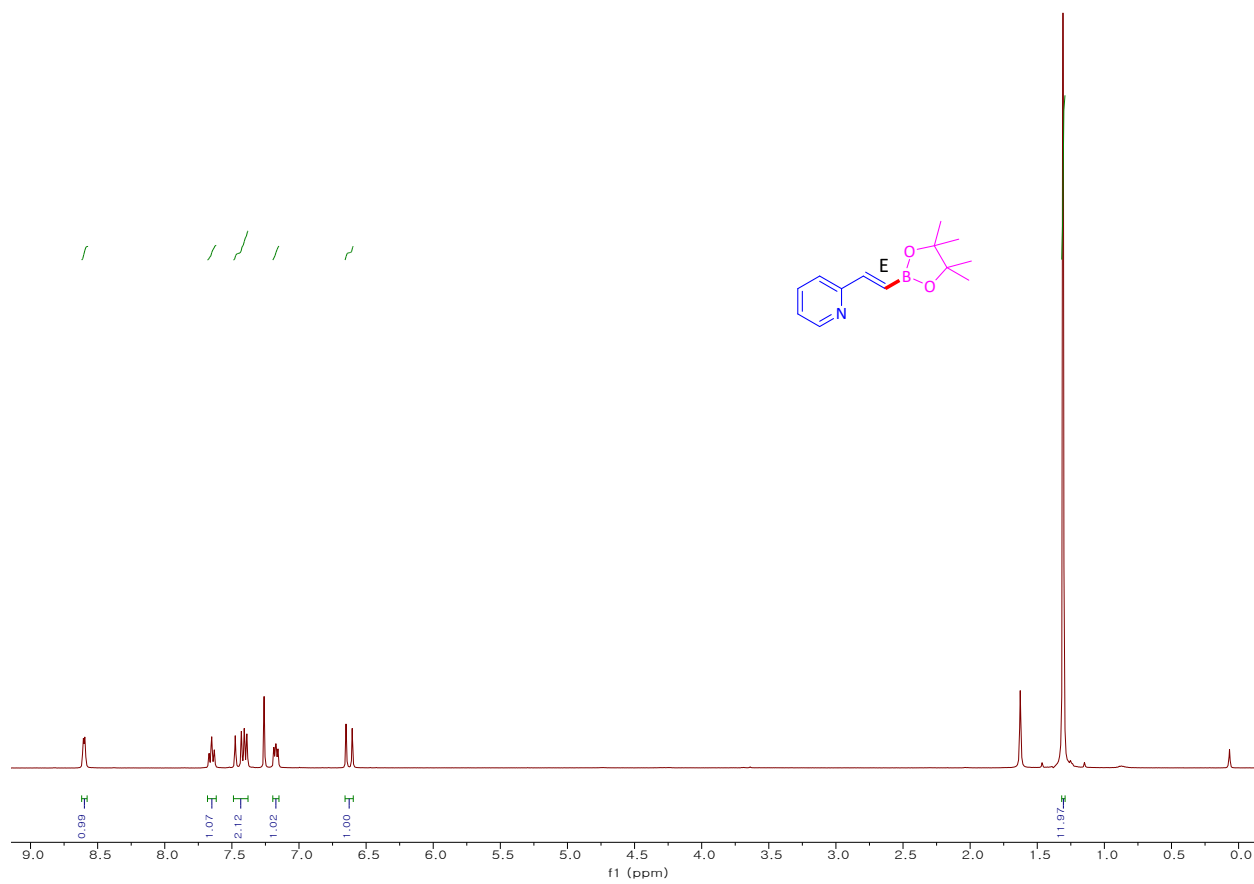

$^1\text{H}$  NMR (400 MHz, Chloroform-*d*)  $\delta$  6.96 (dd,  $J = 31.7, 20.7$  Hz, 3H), 6.58 (d,  $J = 14.0$  Hz, 3H), 5.67 (d,  $J = 18.4$  Hz, 1H), 2.73 (d,  $J = 19.4$  Hz, 3H), 2.04 – 1.66 (m, 7H), 1.34 (s, 12H), 1.26 (s, 8H), 0.86 (s, 3H).

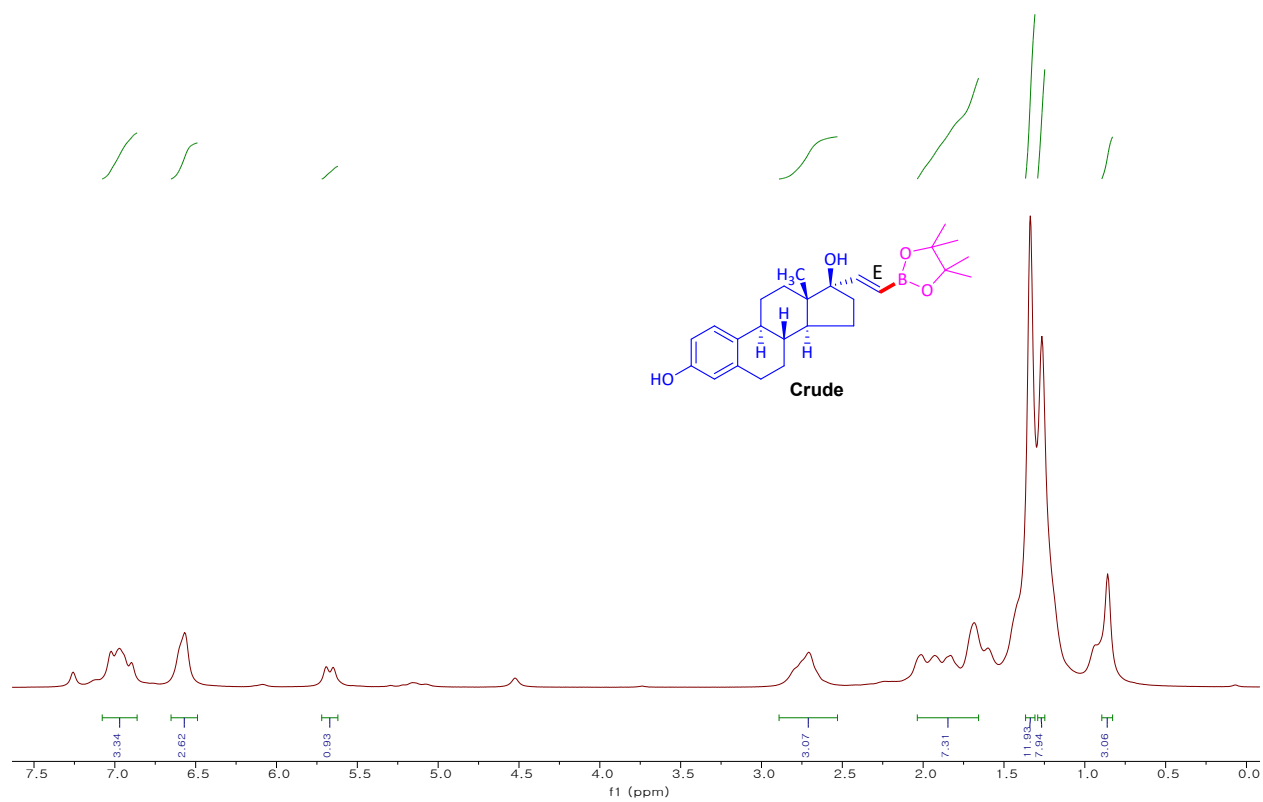

$^1\text{H}$  NMR (400 MHz, Chloroform-*d*)  $\delta$  7.02 (d,  $J = 18.3$  Hz, 1H), 5.42 (d,  $J = 18.2$  Hz, 1H), 2.15 (q,  $J = 6.0, 4.9$  Hz, 4H), 1.70 – 1.55 (m, 5H), 1.27 (d,  $J = 1.4$  Hz, 13H).

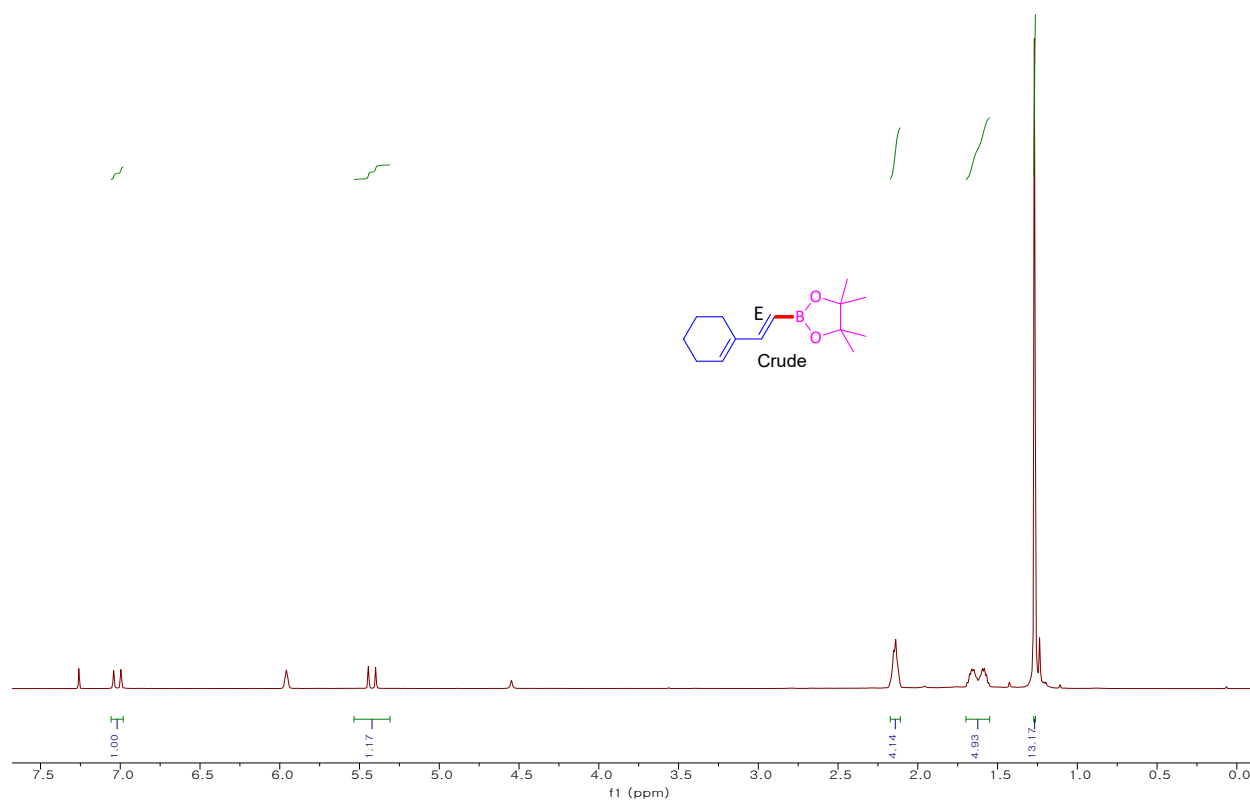

$^1\text{H}$  NMR (400 MHz, Chloroform-*d*)  $\delta$  7.28 (dt,  $J = 15.1, 7.7$  Hz, 4H), 7.18 – 7.15 (m, 2H), 1.92 (d,  $J = 1.8$  Hz, 3H), 1.23 (d,  $J = 1.4$  Hz, 12H).

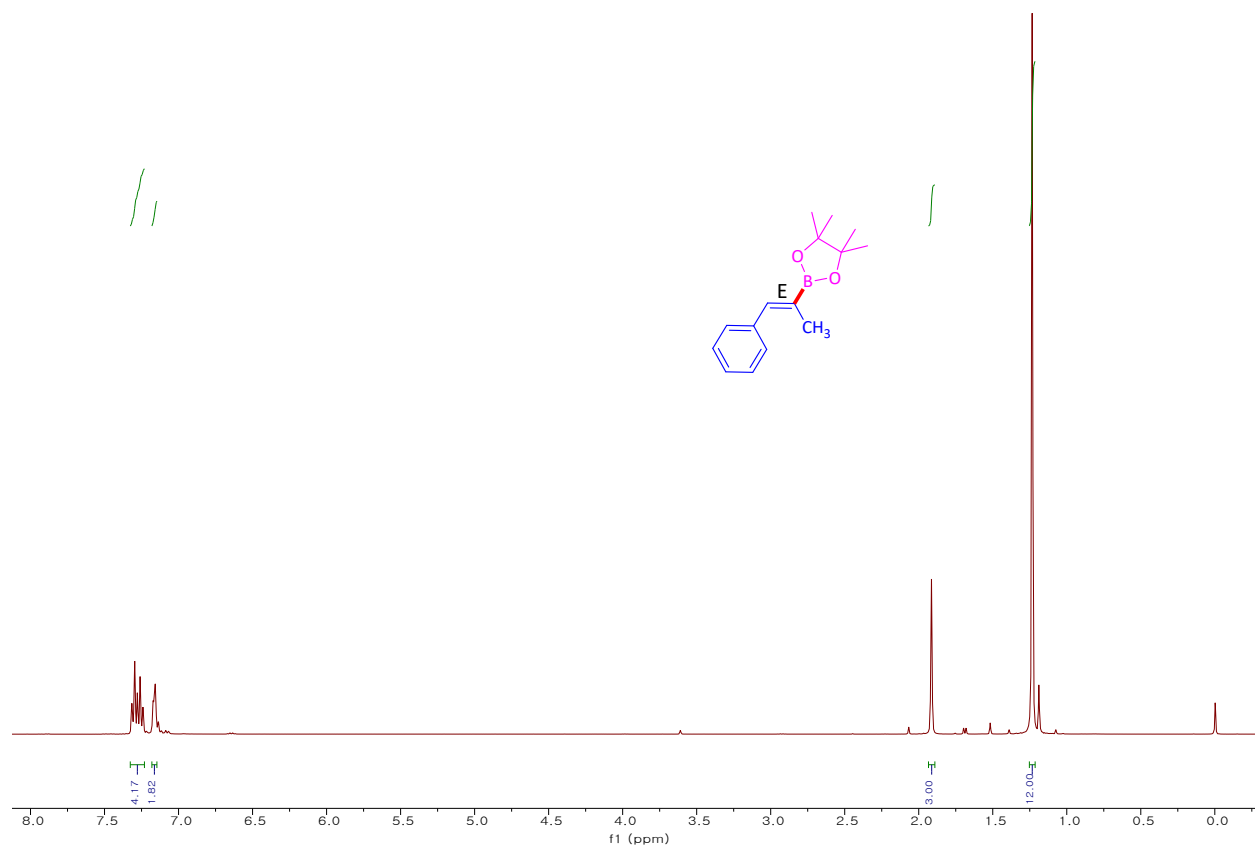

## References

- (1) M. Aelterman, M. Sayes, P. Jubault, T. Poisson, *Chem. Eur. J.* 2021, **27**, 8277-8282.
- (2) X. Zeng, C. Gong, H. Guo, H. Xu, J. Zhang, J. Xie, *New J. Chem.*, 2018, **42**, 17346-17350.
- (3) M. Zhong, Y. Gagne, T. O. Hope, X. Pannecoucke, M. Frenette, P. Jubault, T. Poisson, *Angew. Chem. Int. Ed.* 2021, **60**, 14498-14503.
- (4) B. Wang, L. Gao, H. Yang, G. Zheng, *ACS Appl. Mater. Interfaces* 2021, **13**, 47530-47540.
